# Supplementary figures and images for: CAR T cells targeting CD99 as an approach to eradicate T-cell Acute Lymphoblastic Leukemia without normal blood cells toxicity
Source: Research Square preprint supplement (doi:10.21203/rs.3.rs-753466/v1), 2021-08-05

Supplementary Fig. 3

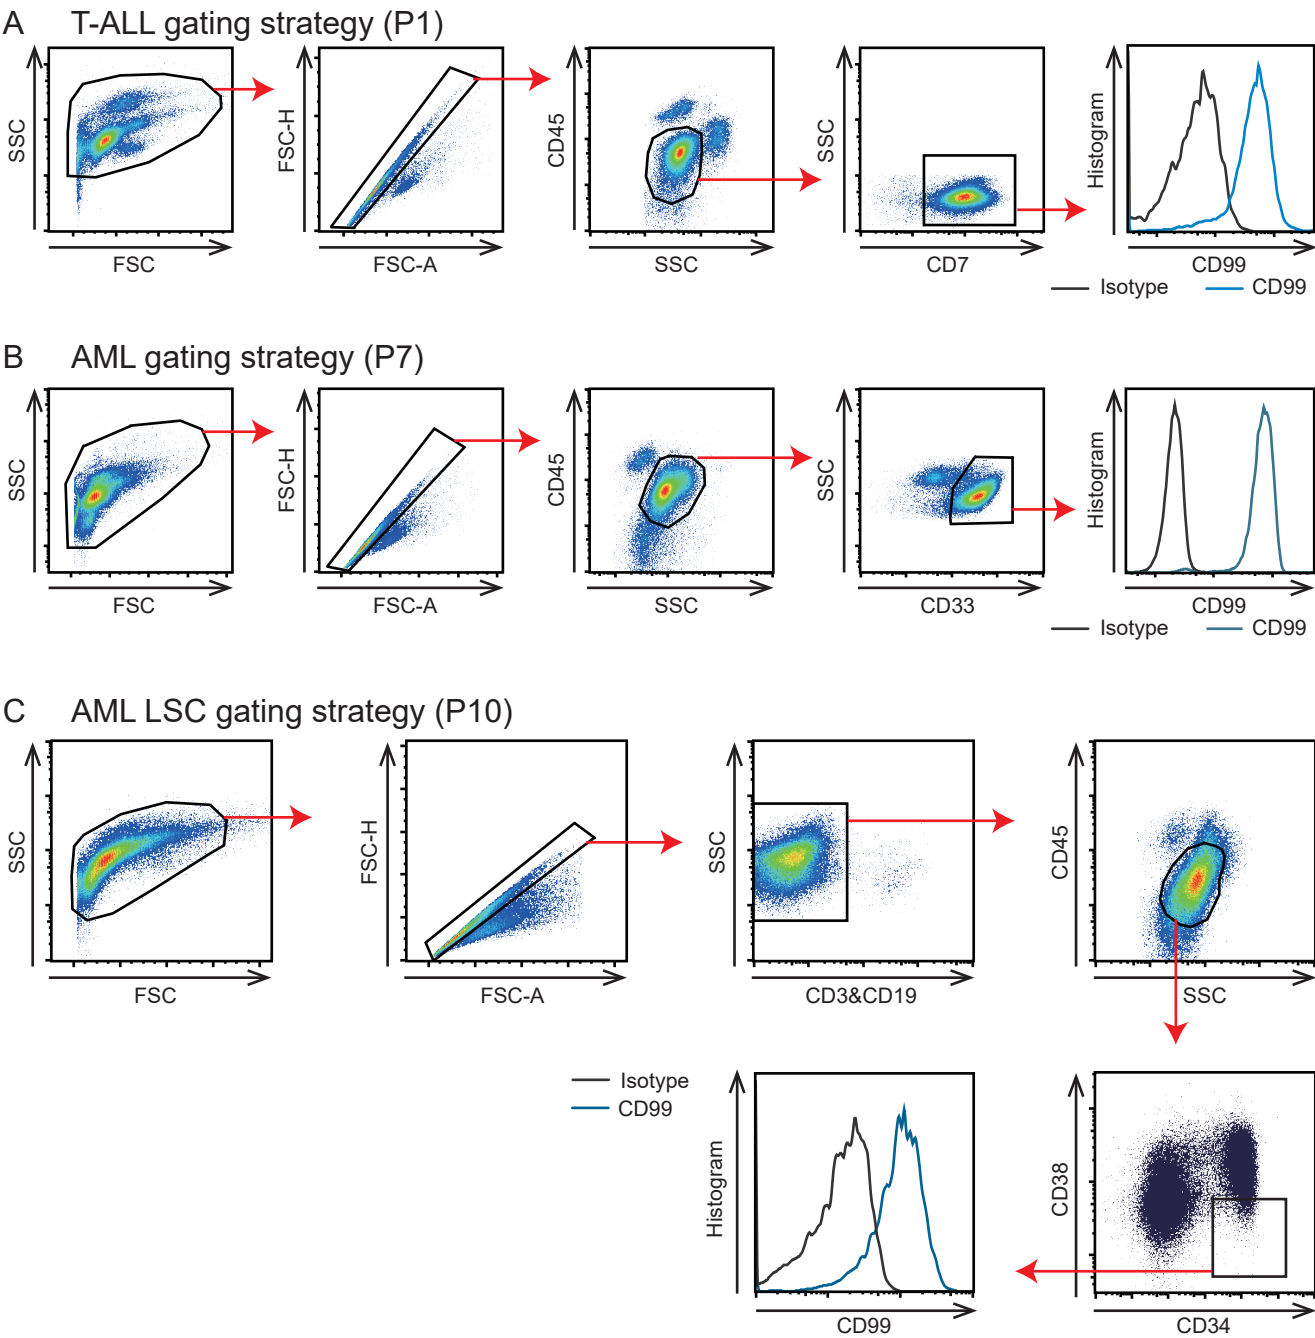

Supplement: Supplementary file 1 [file 8c390e85ed051916a77611dd.pdf]
